# Supplementary material for: Symmetry breaking propulsion of magnetic microspheres in nonlinearly viscoelastic fluids
Source: PubMed Central journal article supplement (PMC7893017; doi:10.1038/s41467-021-21322-0), 2021-02-18
Supplement: 41467_2021_21322_MOESM3_ESM.pdf [file 41467_2021_21322_MOESM3_ESM.pdf]

## **Description of Additional Supplementary Files**

File Name: Supplementary Movie 1

Description: The SI-Video demonstrates all major experiments discussed in the manuscript and provides examples of microparticles propelling in nonlinearly viscoelastic fluids.

File Name: Supplementary Data 1

Description: This .zip folder contains most experimental data collected and presented inside the manuscript and SI document.
